# Supplementary material
Source: PubMed Central journal article supplement (PMC1458691)

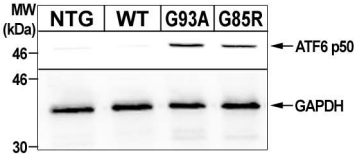

Supplement: pnas_0509227103_1.pdf [file pnas_0509227103_1.pdf]

**A**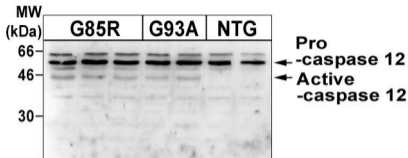**B**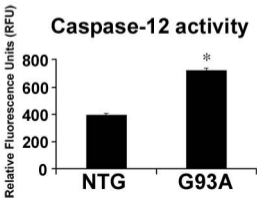

Supplement: pnas_0509227103_2.pdf [file pnas_0509227103_2.pdf]

Synaptotagmin

hSOD1  
mSOD1

COX

Microsomal Fraction

WT

G93A

NTG

Crude  
Mitochondria  
Pellet

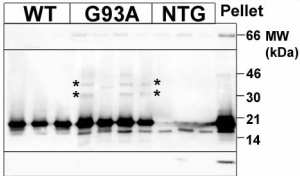

Supplement: pnas_0509227103_3.pdf [file pnas_0509227103_3.pdf]

**SOD1WT**

**SOD1G93A**

1000 500 250 125 62.5 ng

1000 500 250 125 62.5 ng

**Anti-SOD1**

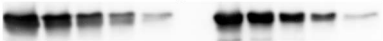

**Coomassie**

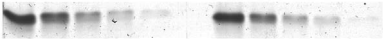

Supplement: pnas_0509227103_4.pdf [file pnas_0509227103_4.pdf]

**A**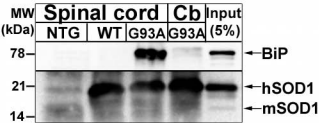**B**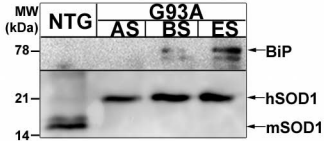

Supplement: pnas_0509227103_5.pdf [file pnas_0509227103_5.pdf]

**A**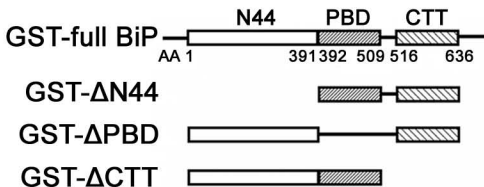**B**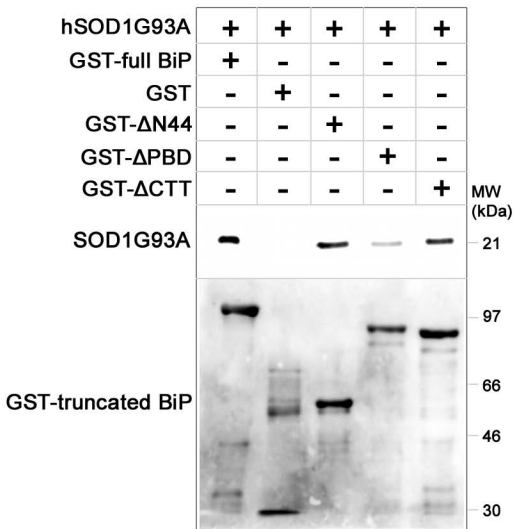

Supplement: pnas_0509227103_6.pdf [file pnas_0509227103_6.pdf]
